# Supplementary material for: Facile Preparation of Porous Carbon Derived from Pomelo Peel for Efficient Adsorption of Methylene Blue
Source: MDPI journal article supplement (doi:10.3390/molecules27103096), 2022-05-11
Supplement: s1 [file s1]

## Supplementary Materials

### Facile Preparation of Porous Carbon Derived from Pomelo Peel for Efficient adsorption of Methylene Blue

**Table S1.** The specific surface area of various porous carbon materials.

| Porous carbon materials                                   | $S_{\text{BET}}$ ( $\text{m}^2\text{g}^{-1}$ ) | References       |
|-----------------------------------------------------------|------------------------------------------------|------------------|
| Graphene oxide gel derived porous carbons                 | 378                                            | [36]             |
| MWNTs-loaded microporous carbons                          | 463                                            | [37]             |
| Polystyrene-based hierarchical porous carbons             | 543                                            | [38]             |
| Fe/ordered mesoporous carbons                             | 731                                            | [39]             |
| N and P co-functionalized three-dimensional porous carbon | 743                                            | [40]             |
| Pomelo peels-derived porous activated carbon microsheets  | 807.7                                          | [41]             |
| Honeycomb-like porous carbon derived from pomelo peel     | 832                                            | [17]             |
| Porous carbon derived from pomelo peel                    | 1892.1                                         | [18]             |
| <b>Pomelo peel derived porous carbon</b>                  | <b>939.4</b>                                   | <b>This work</b> |

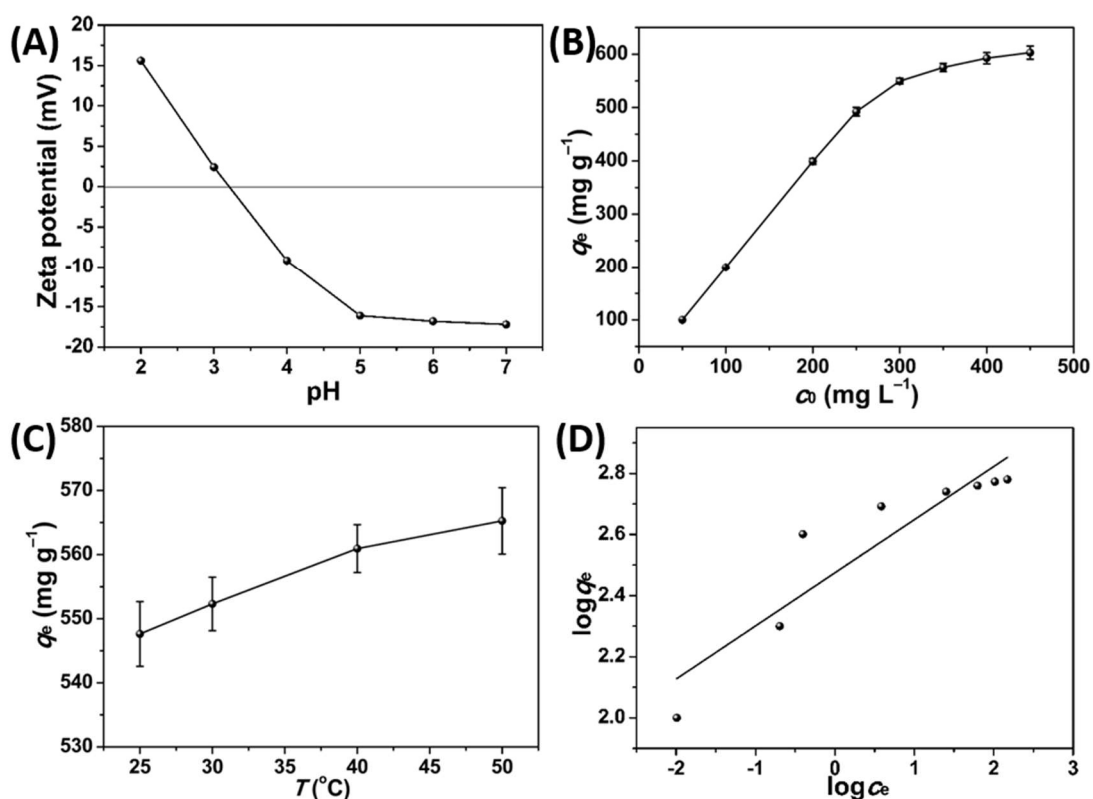

**Figure S1.** (A) Zeta potential of PPPC at different pH. Effect of (B)  $c_0$  and (C)  $T$  for MB adsorption on PPPC. (D) Freundlich isotherm for MB adsorption on PPPC.

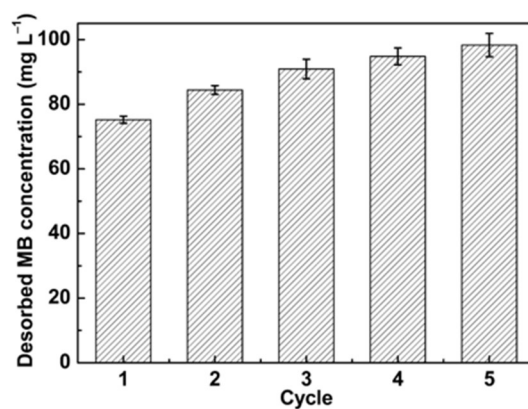

**Figure S2.** The desorbed MB concentrations in ethanol for five cycles.

**Table S2.** The  $q_m$  of various adsorbents toward MB.

| Adsorbents                                                            | $q_m$ (mg g <sup>-1</sup> ) | References       |
|-----------------------------------------------------------------------|-----------------------------|------------------|
| PDA-rGO-kaolin                                                        | 39.663                      | [6]              |
| polyamide-vermiculite nanocomposites                                  | 76.42                       | [42]             |
| Citrus pectin derived Fe <sub>3</sub> O <sub>4</sub> @C nanoparticles | 141.3                       | [43]             |
| Porous soy protein isolate based composite beads                      | 272.4                       | [44]             |
| Ginger straw derived porous carbons                                   | 345.0                       | [3]              |
| Mesoporous activated carbon                                           | 359                         | [45]             |
| Mesoporous magnesium silicate                                         | 382                         | [46]             |
| TiO <sub>2</sub> @C nanosheets                                        | 441                         | [47]             |
| <b>Pomelo peel derived porous carbon</b>                              | <b>602.4</b>                | <b>This work</b> |
